# Supplementary material
Source: MDPI journal article supplement (https://www.mdpi.com/1996-1073/14/16/4721)
Supplement: s1 [file s1 › energies-1303629-supplementary.pdf]

Type of activity: ☒ railway undertaking ☐ infrastructure manager

|                    | Result of the evaluation                                                       |                                                                                                                          |                                                                                                             |                                                                                                                                                   |                                                                                                                                                                                                                           |                                                                                                                                                                                                                                                                                         |                                                                                                                                                                                                                                                                                                                                                      |                                                                                                                                                                                                                                                                                                                                                                      |
|--------------------|--------------------------------------------------------------------------------|--------------------------------------------------------------------------------------------------------------------------|-------------------------------------------------------------------------------------------------------------|---------------------------------------------------------------------------------------------------------------------------------------------------|---------------------------------------------------------------------------------------------------------------------------------------------------------------------------------------------------------------------------|-----------------------------------------------------------------------------------------------------------------------------------------------------------------------------------------------------------------------------------------------------------------------------------------|------------------------------------------------------------------------------------------------------------------------------------------------------------------------------------------------------------------------------------------------------------------------------------------------------------------------------------------------------|----------------------------------------------------------------------------------------------------------------------------------------------------------------------------------------------------------------------------------------------------------------------------------------------------------------------------------------------------------------------|
|                    | 0                                                                              | 1                                                                                                                        | 2                                                                                                           | 3                                                                                                                                                 | 4                                                                                                                                                                                                                         | 5                                                                                                                                                                                                                                                                                       | 6                                                                                                                                                                                                                                                                                                                                                    | 7                                                                                                                                                                                                                                                                                                                                                                    |
| X – Process safety | No, the company does not use any solutions in the field of the digital economy | The company uses simple solutions in the field of the digital economy – basic software supporting processes, e.g., Excel | The company uses simple solutions in the field of the digital economy – basic software supporting processes | The company uses simple solutions in the field of the digital economy – basic software supporting processes but supported by data sets – BIG DATA | The company uses digital economy solutions – advanced software supporting processes supported by data sets – BIG DATA and simulators for knowledge development and process monitoring, and stores data in cloud computing | The company uses advanced digital economy solutions – advanced software supporting processes supported by cybersecurity solutions and interface management, as well as BIG DATA, simulation concepts and simulation tests for several continuous errors during several operator changes | The company uses advanced digital economy solutions based mainly on cybersecurity solutions and interface management, as well as BIG DATA, simulation concepts as well as system integration within the SoS concept, taking into account configuration management and simulation tests for several continuous errors during several operator changes | The company uses advanced digital economy solutions in the area of the Industry 4.0 concept such as:<br>Industrial Intranet of Things (IIoT)<br>• Big Data<br>• Horizontal and vertical system integration<br>• Simulation<br>• Clouds<br>• Extended Reality<br>• Autonomous robots<br>• 3D print<br>• Cybersecurity<br>And also concepts such as:<br>• Digital twin |

|                                                                                                                                                                                         |  |  |  |  |  |  |  | <ul style="list-style-type: none"> <li>• Interface Management</li> <li>• Simulation tests for several continuous errors during several operator changes and other advanced solutions</li> </ul> |
|-----------------------------------------------------------------------------------------------------------------------------------------------------------------------------------------|--|--|--|--|--|--|--|-------------------------------------------------------------------------------------------------------------------------------------------------------------------------------------------------|
| 1. Does the company monitor the system life cycle using digital solutions? If so, to what extent?                                                                                       |  |  |  |  |  |  |  |                                                                                                                                                                                                 |
| 2. Does the company support the process of technical risk management using digital solutions? If so, to what extent?                                                                    |  |  |  |  |  |  |  |                                                                                                                                                                                                 |
| 3. Does the company monitor functional safety using digital solutions? If so, to what extent?                                                                                           |  |  |  |  |  |  |  |                                                                                                                                                                                                 |
| 4. Does the company identify the risks of digital solutions? If so, to what extent?                                                                                                     |  |  |  |  |  |  |  |                                                                                                                                                                                                 |
| 5. Does the company manage information on process safety using digital solutions? If so, to what extent?                                                                                |  |  |  |  |  |  |  |                                                                                                                                                                                                 |
| 6. Does the company report on process safety using digital solutions? If so, to what extent?                                                                                            |  |  |  |  |  |  |  |                                                                                                                                                                                                 |
| 7. Does the company develop plans and programs to prevent accidents using digital solutions? If so, to what extent?                                                                     |  |  |  |  |  |  |  |                                                                                                                                                                                                 |
| 8. Does the company assess risks to safety-critical facilities using digital solutions? If so, to what extent?                                                                          |  |  |  |  |  |  |  |                                                                                                                                                                                                 |
| 9. Does the company use process risk assessment methods with proposed technical and organizational safeguards and risk control measures using digital solutions? If so, to what extent? |  |  |  |  |  |  |  |                                                                                                                                                                                                 |
| 10. Does the company manage processes related to technical rescue using digital solutions? If so, to what extent?                                                                       |  |  |  |  |  |  |  |                                                                                                                                                                                                 |

| Y – Occupational health and safety | Result of the evaluation |                                      |                         |                                      |                          |                           |                                   |                                                            |
|------------------------------------|--------------------------|--------------------------------------|-------------------------|--------------------------------------|--------------------------|---------------------------|-----------------------------------|------------------------------------------------------------|
|                                    | 0                        | 1                                    | 2                       | 3                                    | 4                        | 5                         | 6                                 | 7                                                          |
|                                    | No, the company does not | The company uses simple solutions in | The company uses simple | The company uses simple solutions in | The company uses digital | The company uses advanced | The company uses advanced digital | The company uses advanced digital economy solutions in the |

|  |               |              |              |              |                 |                  |                        |                        |
|--|---------------|--------------|--------------|--------------|-----------------|------------------|------------------------|------------------------|
|  | use any so-   | the field of | solutions in | the field of | economy so-     | digital          | economy solu-          | area of the Industry   |
|  | lutions in    | the digital  | the field of | the digital  | lutions – ad-   | economy          | tions based            | 4.0 concept such as:   |
|  | the field of  | economy –    | the digital  | economy –    | vanced soft-    | solutions        | mainly on cy-          | Industrial             |
|  | the digital   | basic soft-  | economy –    | basic soft-  | ware sup-       | based            | bersecurity so-        | Intranet of Things     |
|  | economy       | ware sup-    | basic soft-  | ware sup-    | porting pro-    | mainly on        | lutions and in-        | (IIoT)                 |
|  | porting pro-  | ware sup-    | porting pro- | porting pro- | cesses sup-     | cybersecu-       | terface man-           |                        |
|  | cesses, e.g., | porting pro- | cesses but   | ported by    | rity solu-      | agement, as      |                        | • Big Data             |
|  | Excel         | cesses but   | supported by | data sets –  | tions and       | well as BIG      |                        | • Horizon-             |
|  |               | supported    | data sets –  | BIG DATA     | interface       | DATA, simula-    |                        | al and vertical system |
|  |               | by data sets | BIG DATA     | and simula-  | manage-         | tors and basic   |                        | integration            |
|  |               | – BIG        | and simula-  | tors for     | ment, as        | process auto-    |                        | • Simula-              |
|  |               | DATA         | tors for     | knowledge    | well as         | mation con-      |                        | tion                   |
|  |               |              | knowledge    | develop-     | BIG             | cepts as well as |                        | • Clouds               |
|  |               |              | development  | ment and     | DATA,           | system inte-     |                        | • Extended             |
|  |               |              | and process  | process      | simulators      | gration within   |                        | Reality                |
|  |               |              | monitoring   | monitoring,  | and basic       | the SoS con-     |                        | • Autono-              |
|  |               |              |              | and stores   | process         | cept, taking     |                        | mous robots            |
|  |               |              |              | data in      | automa-         | into account     |                        | • 3D print             |
|  |               |              |              | cloud com-   | tion con-       | configuration    |                        | • Cyberse-             |
|  |               |              |              | puting       | cepts           | management       |                        | curity                 |
|  |               |              |              |              | and simulation  |                  | And also concepts      |                        |
|  |               |              |              |              | tests for sev-  |                  | such as:               |                        |
|  |               |              |              |              | eral continu-   |                  | • Digital              |                        |
|  |               |              |              |              | ous errors dur- |                  | twin                   |                        |
|  |               |              |              |              | ing several op- |                  | • Interface Manage-    |                        |
|  |               |              |              |              | erator changes  |                  | ment                   |                        |
|  |               |              |              |              |                 |                  | • Simulation tests for |                        |
|  |               |              |              |              |                 |                  | everal continuous er-  |                        |
|  |               |              |              |              |                 |                  | rors during several    |                        |
|  |               |              |              |              |                 |                  | operator changes and   |                        |
|  |               |              |              |              |                 |                  | other advanced solu-   |                        |
|  |               |              |              |              |                 |                  | tions                  |                        |

|                                                                                                                               |  |  |  |  |  |  |  |  |
|-------------------------------------------------------------------------------------------------------------------------------|--|--|--|--|--|--|--|--|
| 1. Does the company monitor the needs of employees and other stakeholders using digital solutions? If so, to what extent?     |  |  |  |  |  |  |  |  |
| 2. Does the company support leadership in the field of safety at work using digital solutions? If so, to what extent?         |  |  |  |  |  |  |  |  |
| 3. Does the company monitor occupational risks using digital solutions? If so, to what extent?                                |  |  |  |  |  |  |  |  |
| 4. Does the company consult employees on work safety issues using digital solutions? If so, to what extent?                   |  |  |  |  |  |  |  |  |
| 5. Does the company monitor dangerous situations in safety-critical processes using digital solutions? If so, to what extent? |  |  |  |  |  |  |  |  |
| 6. Does the company monitor employee behavior using digital solutions? If so, to what extent?                                 |  |  |  |  |  |  |  |  |
| 7. Does the company monitor communication processes in the organization using digital solutions? If so, to what extent?       |  |  |  |  |  |  |  |  |
| 8. Does the company manage change using digital solutions? If so, to what extent?                                             |  |  |  |  |  |  |  |  |
| 9. Is the company ready and responsive to emergencies using digital solutions? If so, to what extent?                         |  |  |  |  |  |  |  |  |
| 10. Does the company monitor a culture of safe work using digital solutions? If so, to what extent?                           |  |  |  |  |  |  |  |  |

|                                                                                  | Result of the evaluation                                                       |                                                                                                   |                                                                                                   |                                                                                                                 |                                                                                                                             |                                                                                                                                              |                                                                                                                                                                         |                                                                                                                                                  |
|----------------------------------------------------------------------------------|--------------------------------------------------------------------------------|---------------------------------------------------------------------------------------------------|---------------------------------------------------------------------------------------------------|-----------------------------------------------------------------------------------------------------------------|-----------------------------------------------------------------------------------------------------------------------------|----------------------------------------------------------------------------------------------------------------------------------------------|-------------------------------------------------------------------------------------------------------------------------------------------------------------------------|--------------------------------------------------------------------------------------------------------------------------------------------------|
|                                                                                  | 0                                                                              | 1                                                                                                 | 2                                                                                                 | 3                                                                                                               | 4                                                                                                                           | 5                                                                                                                                            | 6                                                                                                                                                                       | 7                                                                                                                                                |
| <b>Z – Human and organizational factors<br/>— HSIs (human-system-interfaces)</b> | No, the company does not use any solutions in the field of the digital economy | The company uses simple solutions in the field of the digital economy – basic software supporting | The company uses simple solutions in the field of the digital economy – basic software supporting | The company uses simple solutions in the field of the digital economy – basic software supporting processes but | The company uses simple solutions in the field of the digital economy – advanced software supporting processes supported by | The company uses advanced digital economy solutions in the field of the digital economy – advanced digital solutions mainly on cybersecurity | The company uses advanced digital economy solutions in the field of the digital economy – advanced digital solutions mainly on cybersecurity management, as well as BIG | The company uses advanced digital economy solutions in the area of the Industry 4.0 concept such as:<br><br>Industrial Intranet of Things (IIoT) |

|                                                                                                                                          |  |                           |                                                               |                                                                                                                             |                                                                                                                                                                    |                                                                                                                                                       |                                                                                                                                                                                                                                                                                                                   |                                                                                                                                                                                                                                                                                                                                                                                                                                                                                                                                                                                                  |
|------------------------------------------------------------------------------------------------------------------------------------------|--|---------------------------|---------------------------------------------------------------|-----------------------------------------------------------------------------------------------------------------------------|--------------------------------------------------------------------------------------------------------------------------------------------------------------------|-------------------------------------------------------------------------------------------------------------------------------------------------------|-------------------------------------------------------------------------------------------------------------------------------------------------------------------------------------------------------------------------------------------------------------------------------------------------------------------|--------------------------------------------------------------------------------------------------------------------------------------------------------------------------------------------------------------------------------------------------------------------------------------------------------------------------------------------------------------------------------------------------------------------------------------------------------------------------------------------------------------------------------------------------------------------------------------------------|
|                                                                                                                                          |  | processes,<br>e.g., Excel | processes<br>but sup-<br>ported by<br>data sets –<br>BIG DATA | supported by<br>data sets –<br>BIG DATA<br>and simula-<br>tors for<br>knowledge<br>development<br>and process<br>monitoring | data sets –<br>BIG DATA<br>and simula-<br>tors for<br>knowledge<br>develop-<br>ment and<br>process<br>monitoring,<br>and stores<br>data in<br>cloud com-<br>puting | solutions<br>and inter-<br>face man-<br>agement,<br>as well as<br>BIG<br>DATA,<br>simulators<br>and basic<br>process<br>automa-<br>tion con-<br>cepts | DATA, simula-<br>tors and basic<br>process auto-<br>mation con-<br>cepts as well as<br>system integra-<br>tion within the<br>SoS concept,<br>taking into ac-<br>count configu-<br>ration manage-<br>ment and sim-<br>ulation tests for<br>several contin-<br>uous errors<br>during several<br>operator<br>changes | <ul style="list-style-type: none"> <li>• Big Data</li> <li>• Horizon-<br/>tal and vertical sys-<br/>tem integration</li> <li>• Simula-<br/>tion</li> <li>• Clouds</li> <li>• Extended<br/>Reality</li> <li>• Autono-<br/>mous robots</li> <li>• 3D print</li> <li>• Cyberse-<br/>curity</li> </ul> <p>And also concepts<br/>such as:</p> <ul style="list-style-type: none"> <li>• Digital<br/>twin</li> <li>• Interface Manage-<br/>ment</li> <li>• Simulation tests<br/>for several contin-<br/>uous errors during<br/>several operator<br/>changes and other<br/>advanced solutions</li> </ul> |
| 1. Does the company monitor human errors using digital solutions? If so, to what extent?                                                 |  |                           |                                                               |                                                                                                                             |                                                                                                                                                                    |                                                                                                                                                       |                                                                                                                                                                                                                                                                                                                   |                                                                                                                                                                                                                                                                                                                                                                                                                                                                                                                                                                                                  |
| 2. Does the company identify and monitor interfaces – Human-System Interfaces using digital solutions? If so, to what extent?            |  |                           |                                                               |                                                                                                                             |                                                                                                                                                                    |                                                                                                                                                       |                                                                                                                                                                                                                                                                                                                   |                                                                                                                                                                                                                                                                                                                                                                                                                                                                                                                                                                                                  |
| 3. Does the company manage the competences of personnel performing safety-critical tasks using digital solutions? If so, to what extent? |  |                           |                                                               |                                                                                                                             |                                                                                                                                                                    |                                                                                                                                                       |                                                                                                                                                                                                                                                                                                                   |                                                                                                                                                                                                                                                                                                                                                                                                                                                                                                                                                                                                  |

|                                                                                                                                                                                     |  |  |  |  |  |  |  |  |
|-------------------------------------------------------------------------------------------------------------------------------------------------------------------------------------|--|--|--|--|--|--|--|--|
| 4. Does the company monitor human limitations using digital solutions? If so, to what extent?                                                                                       |  |  |  |  |  |  |  |  |
| 5. Does the company identify and monitor risks associated with the construction and use of equipment, tasks, and working conditions using digital solutions? If so, to what extent? |  |  |  |  |  |  |  |  |
| 6. Does the company monitor work ergonomics using digital solutions? If so, to what extent?                                                                                         |  |  |  |  |  |  |  |  |
| 7. Does the company monitor employee fatigue and related risks using digital solutions? If so, to what extent?                                                                      |  |  |  |  |  |  |  |  |
| 8. Does the company ensure the expected physical and psychological capacity using digital solutions? If so, to what extent?                                                         |  |  |  |  |  |  |  |  |
| 9. Does the company take into account the integration of human and organizational factors in the process of change management using digital solutions? If so, to what extent?       |  |  |  |  |  |  |  |  |
| 10. Does the company monitor the level of human reliability using digital solutions? If so, to what extent?                                                                         |  |  |  |  |  |  |  |  |

|                                     | Result of the evaluation                                                       |                                                                                                                          |                                                                                                                                        |                                                                                                                                                                      |                                                                                                                                                                  |                                                                                                                                                                                                                                     |                                                                                                                                                                                    |                                                                                                                                                                                                                         |
|-------------------------------------|--------------------------------------------------------------------------------|--------------------------------------------------------------------------------------------------------------------------|----------------------------------------------------------------------------------------------------------------------------------------|----------------------------------------------------------------------------------------------------------------------------------------------------------------------|------------------------------------------------------------------------------------------------------------------------------------------------------------------|-------------------------------------------------------------------------------------------------------------------------------------------------------------------------------------------------------------------------------------|------------------------------------------------------------------------------------------------------------------------------------------------------------------------------------|-------------------------------------------------------------------------------------------------------------------------------------------------------------------------------------------------------------------------|
|                                     | 0                                                                              | 1                                                                                                                        | 2                                                                                                                                      | 3                                                                                                                                                                    | 4                                                                                                                                                                | 5                                                                                                                                                                                                                                   | 6                                                                                                                                                                                  | 7                                                                                                                                                                                                                       |
| <b>T – Safety Management System</b> | No, the company does not use any solutions in the field of the digital economy | The company uses simple solutions in the field of the digital economy – basic software supporting processes, e.g., Excel | The company uses simple solutions in the field of the digital economy – basic software supporting processes but supported by data sets | The company uses simple solutions in the field of the digital economy – basic software supporting processes but supported by data sets – BIG DATA and simulators for | The company uses digital solutions in the field of the digital economy – advanced software supporting processes supported by data sets – BIG DATA and simulators | The company uses advanced digital solutions in the field of the digital economy – advanced solutions based mainly on cybersecurity solutions and interface management, as well as BIG DATA, simulators and basic process automation | The company uses advanced digital economy solutions based mainly on cybersecurity solutions and interface management, as well as BIG DATA, simulators and basic process automation | he company uses advanced digital economy solutions in the area of the Industry 4.0 concept such as:<br><br>• Industrial Intranet of Things (IIoT)<br><br>• Big Data<br><br>• Horizontal and vertical system integration |

|                                                                                                                                                            |  |  |               |                                                       |                                                                                                                     |                                                                                                     |                                                                                                                                                                                                                                           |                                                                                                                                                                                                                                                                                                                                                                                                                                                                     |
|------------------------------------------------------------------------------------------------------------------------------------------------------------|--|--|---------------|-------------------------------------------------------|---------------------------------------------------------------------------------------------------------------------|-----------------------------------------------------------------------------------------------------|-------------------------------------------------------------------------------------------------------------------------------------------------------------------------------------------------------------------------------------------|---------------------------------------------------------------------------------------------------------------------------------------------------------------------------------------------------------------------------------------------------------------------------------------------------------------------------------------------------------------------------------------------------------------------------------------------------------------------|
|                                                                                                                                                            |  |  | – BIG<br>DATA | knowledge<br>development<br>and process<br>monitoring | for<br>knowledge<br>develop-<br>ment and<br>process<br>monitoring,<br>and stores<br>data in<br>cloud com-<br>puting | as well as<br>BIG<br>DATA,<br>simula-<br>tors and<br>basic pro-<br>cess auto-<br>mation<br>concepts | concepts as<br>well as system<br>integration<br>within the SoS<br>concept, taking<br>into account<br>configuration<br>management<br>and simulation<br>tests for several<br>continuous er-<br>rors during sev-<br>eral operator<br>changes | <ul style="list-style-type: none"> <li>• Simula-<br/>tion</li> <li>• Clouds</li> <li>• Extended<br/>Reality</li> <li>• Autono-<br/>mous robots</li> <li>• 3D print</li> <li>• Cyberse-<br/>curity</li> <li>And also concepts<br/>such as:</li> <li>• Digital<br/>twin</li> <li>• Interface Manage-<br/>ment</li> <li>• Simulation tests<br/>for several continu-<br/>ous errors during<br/>several operator<br/>changes and other<br/>advanced solutions</li> </ul> |
| 1. Does the company create the management intentions of top managers and leadership in the field of safety using digital solutions? If so, to what extent? |  |  |               |                                                       |                                                                                                                     |                                                                                                     |                                                                                                                                                                                                                                           |                                                                                                                                                                                                                                                                                                                                                                                                                                                                     |
| 2. Does the company monitor safety policy and safety objectives using digital solutions? If so, to what extent?                                            |  |  |               |                                                       |                                                                                                                     |                                                                                                     |                                                                                                                                                                                                                                           |                                                                                                                                                                                                                                                                                                                                                                                                                                                                     |
| 3. Does the company monitor operational, organizational and technical risks using digital solutions? If so, to what extent?                                |  |  |               |                                                       |                                                                                                                     |                                                                                                     |                                                                                                                                                                                                                                           |                                                                                                                                                                                                                                                                                                                                                                                                                                                                     |
| 4. Does the company build and monitor the awareness of human limitations in an organization using digital solutions? If so, to what extent?                |  |  |               |                                                       |                                                                                                                     |                                                                                                     |                                                                                                                                                                                                                                           |                                                                                                                                                                                                                                                                                                                                                                                                                                                                     |

|                                                                                                                                                                 |  |  |  |  |  |  |  |  |
|-----------------------------------------------------------------------------------------------------------------------------------------------------------------|--|--|--|--|--|--|--|--|
| 5. Does the company control the professional process of conduct within processes identified in the organization using digital solutions? If so, to what extent? |  |  |  |  |  |  |  |  |
| 6. Does the company monitor criteria for risk acceptance and safety measures using digital solutions? If so, to what extent?                                    |  |  |  |  |  |  |  |  |
| 7. Does the company monitor risks associated with operational processes throughout the value chain using digital solutions? If so, to what extent?              |  |  |  |  |  |  |  |  |
| 8. Does the company monitor the performance of partners and suppliers in the context of safety criteria using digital solutions? If so, to what extent?         |  |  |  |  |  |  |  |  |
| 9. Does the company manage in crisis situations, monitoring these processes using digital solutions? If so, to what extent?                                     |  |  |  |  |  |  |  |  |
| 10. Does the company monitor the conclusions from accidents and incidents using digital solutions? If so, to what extent?                                       |  |  |  |  |  |  |  |  |
